# Supplementary material for: Self-assembled benzyl mercaptan monolayer as a coating in electromembrane surrounded solid-phase microextraction of antihistamines in urine and plasma samples
Source: Royal Society of Chemistry journal article supplement (doi:10.1039/c5nj03334a), 2016-01-01

## Supporting information

### **Self-assembled benzyl mercaptan monolayer as a coating in electromembrane surrounded solid-phase microextraction of antihistamines in urine and plasma samples**

Maryam Shamsayei<sup>a</sup>, Yadollah Yamini<sup>a\*</sup>, Maryam Rezazadeh<sup>a</sup>, Hamid Asiabi<sup>a</sup>, Shahram Seidi<sup>b</sup>

<sup>a</sup> *Department of Chemistry, Tarbiat Modares University, P. O. Box 14115-175, Tehran, Iran*

<sup>b</sup> *Department of Analytical Chemistry, Faculty of Chemistry, K. N. Toosi University of Technology, Tehran  
16315-1355, Iran*

---

\*Corresponding author: Tel.: +98 21 82883417; Fax: +98 21 88006544.

E-mail address: [yyamini@modares.ac.ir](mailto:yyamini@modares.ac.ir) (Y. Yamini).

**Table S1**Chemical structures,  $pK_a$ , and  $\log P$  of ANT and NAP.

| Chemical structure                                                                | IUPAC name                                             | Abbreviation | $pK_a$ | $\log P$ |
|-----------------------------------------------------------------------------------|--------------------------------------------------------|--------------|--------|----------|
| 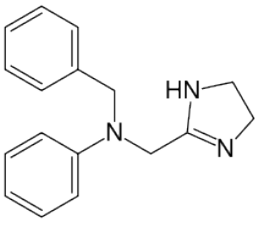 | N-benzyl-N-(4,5-dihydro-1H-imidazol-2-ylmethyl)aniline | ANT          | 9.24   | 2.88     |
|  | 2-(naphthalen-1-ylmethyl)-4,5-dihydro-1H-imidazole     | NAP          | 10.19  | 2.19     |

**Fig. S1.** Schematic representation of benzyl mercaptan reaction with copper wire surface.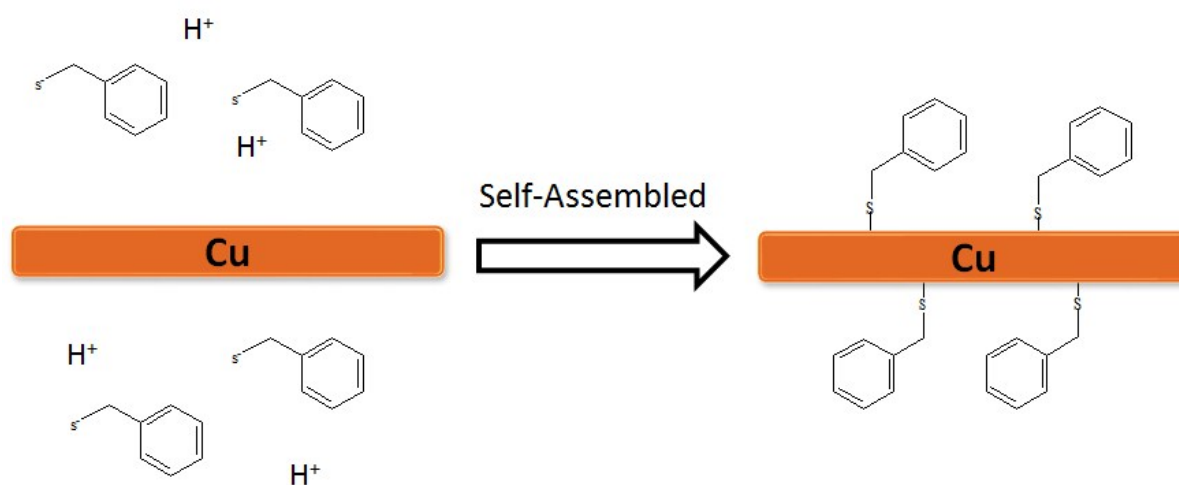

**Fig. S2.** Cyclic voltammograms of (a) bare copper electrode (b) benzyl mercaptan/ copper electrode in 1mM ferrocyanide.

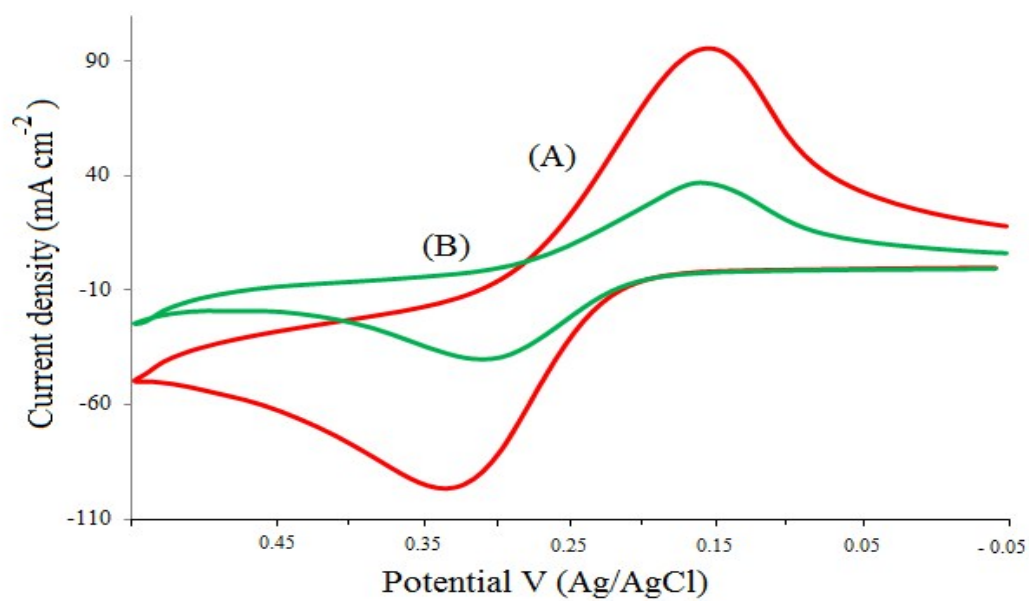

**Fig. S3.** Effect of concentration of additives in NPOE on extraction efficiency of NAP and ANT. Extraction conditions: spiked concentration: 50.0 ng mL<sup>-1</sup>, voltage: 100 V, sample volume: 10 mL, extraction time: 10 min, stirring rate: 700 rpm, and no salt addition.

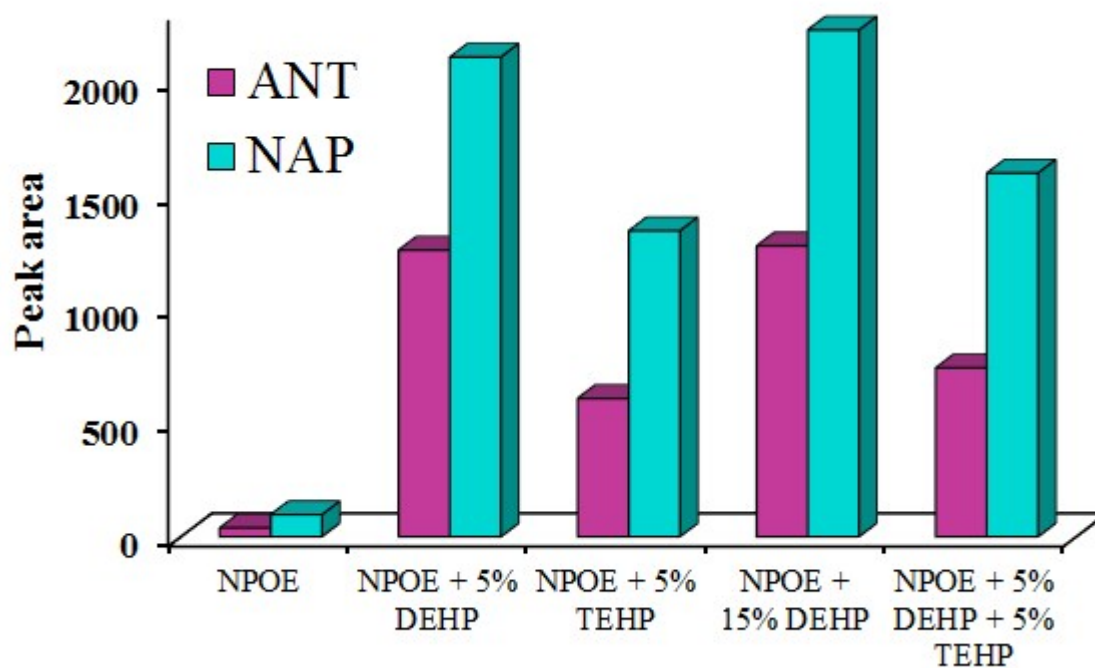

Supplement: c5nj03334a1.pdf [file c5nj03334a1.pdf]
